# Supplementary material for: Anti-Tumor Immunogenicity of the Oncolytic Virus CF33-hNIS-antiPDL1 against Ex Vivo Peritoneal Cells from Gastric Cancer Patients
Source: MDPI journal article supplement (doi:10.3390/ijms241814189), 2023-09-16
Supplement: s1 [file s1]

**SUPPLEMENTAL MATERIAL:**

**Supplemental Table S1. Antibody and reagent information.**

| <b>Reagents Name</b>                                    | <b>company</b>               | <b>Catalog #</b> | <b>Clone #</b> | <b>Lot #</b> | <b>Expire</b> |
|---------------------------------------------------------|------------------------------|------------------|----------------|--------------|---------------|
| Anti-h CD45-BUV395                                      | BD                           | 563792           | HI30           | 9269807      |               |
| BD Pharm Lyse™ lysing solution                          | BD                           | 555899           |                | 8149712      |               |
| Anti-h CD4-BV510                                        | Biolegend                    | 317444           | OKT4           | B292551      |               |
| Anti-h CD8a-PE-Cy5                                      | Biolegend                    | 300910           | HIT8a          | B300799      |               |
| Anti-h CD14-Alexa 700                                   | Biolegend                    | 325614           | HCD14          | B243612      |               |
| Anti-h CD3-APC-Cy7                                      | Biolegend                    | 317342           | OKT3           | B282905      |               |
| Anti-h CD274-PE                                         | Biolegend                    | 329706           | 29E.2A3        | B272166      |               |
| Mouse isotype PerCP/Cy5.5                               | Biolegend                    | 400338           | MPC-11         | B275227      |               |
| Mouse isotype PE                                        | Biolegend                    | 402204           | 27-35          | B271045      |               |
| Mouse isotype APC                                       | Biolegend                    | 402206           | 27-35          | B272605      |               |
| Anti-h CD86-APC                                         | Biolegend                    | 374208           | BU63           | B262802      |               |
| Anti-h CTLA4-PerCP/Cy5.5                                | Biolegend                    | 369608           | BNI3           | B267053      |               |
| Anti-h CD107α-PE                                        | Biolegend                    | 328608           | H4A3           | B283846      |               |
| Anti-h CD160-PerCP/Cy5.5                                | Biolegend                    | 341210           | BY55           | B262314      |               |
| Anti-h CD223-PE(LAG-3)                                  | Biolegend                    | 369206           | 7H2C65         | B271246      |               |
| Anti-h CD25-APC                                         | Biolegend                    | 302610           | BC96           | B258747      |               |
| Anti-h CD80-FITC                                        | Biolegend                    | 305206           | 2D10           | B219028      |               |
| Anti-h CD279-PerCP/Cy5.5 (PD1)                          | Biolegend                    | 329914           | EH12.2H7       | B267952      |               |
| Zombie UV dye                                           | Biolegend                    | 423108           |                |              |               |
| Anti-h CEA-Alexa 488                                    | R&D Systems                  | FAB41281G        | 487609         | 1536943      |               |
| Human XL Cytokine Luminex Performance Assay Fixed Panel | R&D Systems                  | LKTM014          |                | P189369      |               |
| Pooled normal human male AB Serum                       | Innovative Research          | IPLA-SERAB-27146 |                |              | Jul2023       |
| Anti-human EPCAM:                                       | Ventana                      | 760-4383         | 1Ber-EP4       | V0002926     |               |
| Anti-human PD-L1                                        | Ventana                      | 740-4907         | SP263          | F31218       |               |
| Anti-human Foxp3                                        | abcam                        | ab20034          | 236A/E7        | GR3409148-8  |               |
| Anti-FLAG Tag (DYKDDDDK)                                | Cell Signaling               | 14793            | D6W5B          | No.4         |               |
| Paraformaldehyde 32%                                    | Electron Microscopy Sciences | 15714            |                | 181210-10    |               |

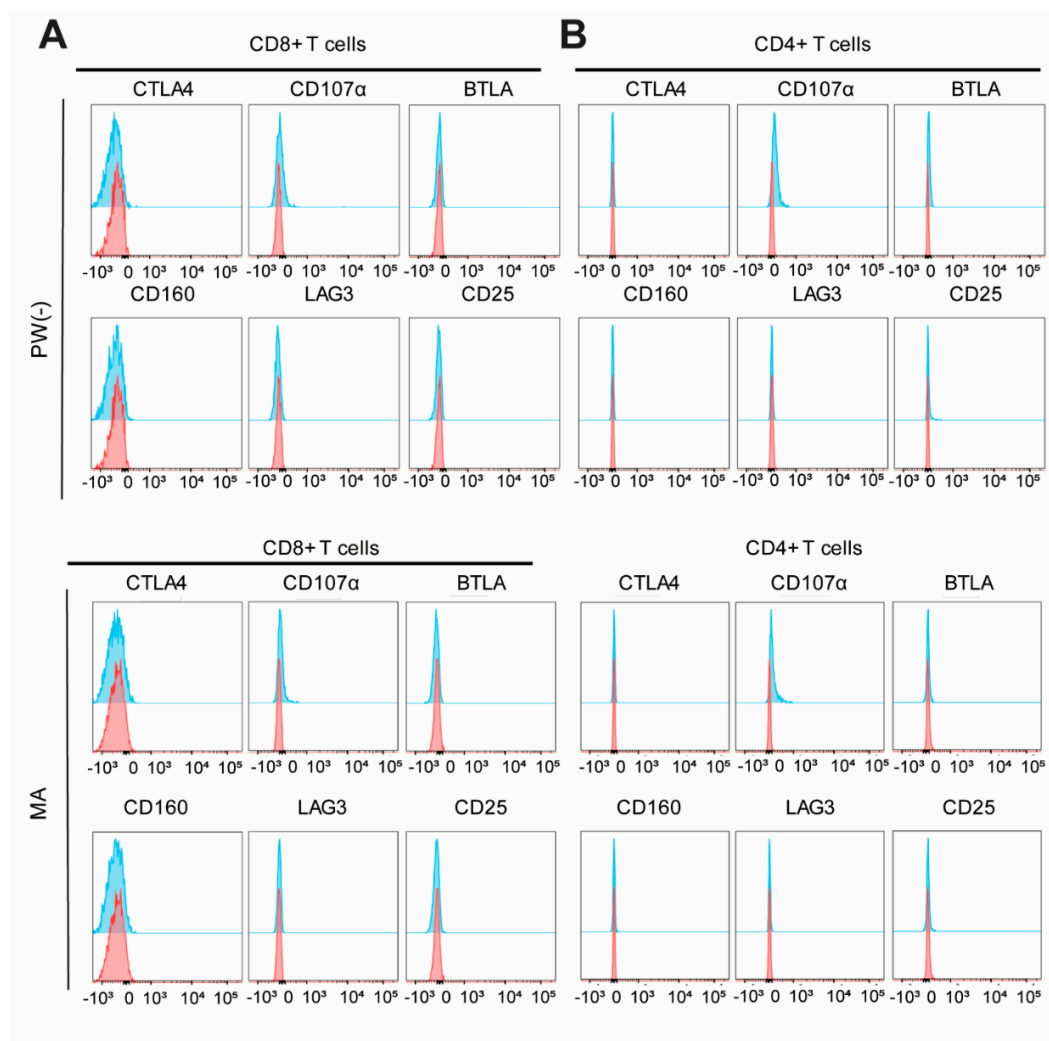

**Supplemental Figure S1.** CD8+ and CD4+ T cell immune marker expression of ex vivo cells from patients with GCPM. Fresh ex vivo cells from peritoneal washing (PW(-)) or malignant ascites (MA) were stained with anti-CD45, anti-CD3, anti-CD4, and anti-CD8 antibodies and the markers shown in the figure. CD8+ T cells (A) and CD4+ T cells (B) were gated and analyzed as a histogram for immune markers. One representative of each marker is shown in the figure.

### Previous treatment (PT) vs no previous treatment (NPT)

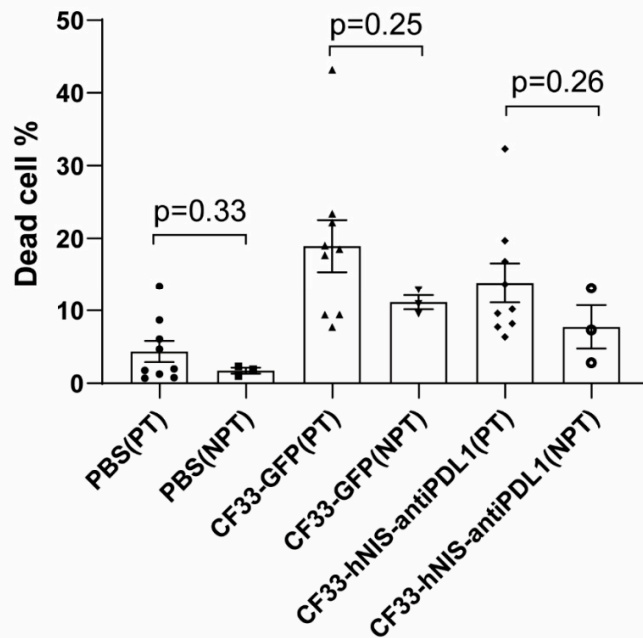

**Supplemental Figure S2. Evaluation of previous treatment versus no previous treatment for the efficacy of virus-killing ex vivo cancer cells at the 15 hour time point.** A total of 12 samples, of which there were 9 samples with previous treatment (PT) and 3 samples with no previous treatment (NPT) before specimen collection, were treated with PBS, CF33-GFP (MOI=3), or CF33-hNIS-antiPDL1 (MOI=3) for 15 hours and the dead cell percentage of each group is shown in the figure (Mean±SEM).
